# Supplementary material for: Modulation of striatal functional connectivity differences in adults with and without autism spectrum disorder in a single-dose randomized trial of cannabidivarin
Source: Mol Autism. 2021 Jul 1;12:49. doi: 10.1186/s13229-021-00454-6 (PMC8252312; doi:10.1186/s13229-021-00454-6)
Supplement: Supplementary file 2 — Additional file 2. Table S3. Baseline striatal functional connectivity in the neurotypicals. Table displays statistics for targets (regions containing the cluster peak), including cluster size (in voxels), T-value (T-val), FDR-corrected significance level (pFDR), and peak coordinates in Montreal Neurological Institute (MNI) space (x,y,z). Abbreviations: DC, dorsal caudate; dcP, dorsal-caudal putamen; drP, dorsal-rostral putamen; L, left; R, right; ROI, region of interest; vrP, ventralrostral putamen; VSi, inferior ventral striatum; VSs, superior ventral striatum. Table S4. Baseline striatal functional connectivity in the ASD group. Table displays statistics for targets (regions containing the cluster peak), including cluster size (in voxels), T-value (T-val), FDR-corrected significance level (pFDR), and peak coordinates in Montreal Neurological Institute (MNI) space (x,y,z). Abbreviations: DC, dorsal caudate; dcP, dorsal-caudal putamen; drP, dorsal-rostral putamen; L, left; R, right; ROI, region of interest; vrP, ventralrostral putamen; VSi, inferior ventral striatum; VSs, superior ventral striatum. [file 13229_2021_454_MOESM2_ESM.xlsx]

## Sheet: Table S3
ROI	Seed	Region with FC peak	Size (vox)	T-val	pFDR	x	y	z
L caudate	L VSi	Frontal medial cortex	4099	13.62	0	-8	8	-8
		L insular cortex	125	7.86	0.0034	-42	4	-6
	L VSs	L thalamus	6350	21.5	0	-10	14	0
		L paracingulate gyrus	148	6.88	0.0017	0	22	38
		R anterior parahippocampal cortex	87	-7.31	0.0169	20	-2	-30
	L DC	L caudate	4294	16.12	0	-14	16	10
		L superior frontal gyrus	179	6.98	0.0003	-18	20	66
		Precuneous	163	-7.17	0.0004	4	-60	68
		R cerebellum crus 2	122	7.01	0.002	38	-76	-38
		L intracalcarine cortex	103	-7.22	0.0043	-16	-64	8
R caudate	R VSi	Subcallosal cortex	2818	11.07	0	8	8	-8
		L caudate	96	-7.79	0.0147	-18	-12	24
		Precuneous	76	-7.01	0.0296	-24	-50	10
	R VSs	R putamen	5588	17.1	0	10	14	0
		R cuneal cortex	244	-7.25	0	18	-90	16
		Vermis 4, 5	196	-9.08	0.0001	-2	-48	-4
		L lingual gyrus	159	-7.99	0.0003	-36	-46	-2
		L superior lateral occipital cortex	131	-7.46	0.001	-12	-88	32
		L superior lateral occipital cortex	64	-5.9	0.0281	-8	-74	60
	R DC	R thalamus	5443	18.71	0	12	14	10
		Precuneous	144	-8.68	0.0019	16	-40	32
		R occipital pole	95	-6.55	0.014	18	-88	32
		R frontal pole	85	5.4	0.018	36	56	8
		Preuneous	62	-5.84	0.0452	-2	-60	68
L putamen	L vrP	L putamen	7717	21.61	0	-20	14	-2
		L supplementary motor area	286	9.09	0	-10	-4	66
		L frontal pole	248	7.28	0	-32	40	26
		Anterior cingulate gyrus	159	8.52	0.0003	-6	12	36
		Brain stem	75	-7.63	0.0193	-20	-24	-32
		Precuneous	62	-6.19	0.0354	-14	-52	14
	L drP	L putamen	5890	10.9	0	-24	8	8
		Anterior cingulate gyurs	879	11.5	0	-8	-10	64
		L lingual gyrus	179	-9.62	0.0002	-24	-48	-4
		Precuneous	154	-8.23	0.0005	34	-58	24
		L central opercular cortex	135	-6.98	0.001	-26	0	24
		L middle frontal gyrus	118	8.03	0.002	-30	36	30
		R superior lateral occipital cortex	98	-6.36	0.0048	40	-70	48
		L anterior middle temporal gyrus	88	-10.01	0.0058	-54	-4	-26
		R superior parietal lobule	53	6.64	0.0394	24	-40	58
	L dcP	L putamen	6493	16.72	0	-28	0	4
		L supplementary motor area	450	6.88	0	-6	-4	50
		R cuneal cortex	341	-8.66	0	-2	-80	28
		L caudate	333	-11.21	0	-22	28	12
		R frontal pole	275	-8.14	0	32	20	20
		R superior parietal lobule	177	10.37	0.0001	10	-46	62
		R frontal pole	86	5.97	0.0089	40	42	-2
		Anterior cingulate cortex	84	5.77	0.0089	2	28	10
		PostCG l	65	8	0.0239	-24	-38	56
		R planum temporale	54	5.24	0.0414	50	-24	10
		R anterior supramarginal gyrus	53	6.19	0.0414	56	-20	32
R putamen	R vrP	R putamen	6662	18.88	0	20	12	-4
		Precuneous	852	-8.73	0	-2	-50	10
		R precentral gyrus	146	8.29	0.001	40	-2	56
		L frontal pole	141	7.54	0.001	-30	36	30
		R frontal pole	94	8.59	0.0082	32	42	28
		L superior lateral occipital cortex	81	-7.07	0.0141	-36	-64	18
	R drP	R putamen	6827	16.23	0	24	8	6
		L supplementary motor area	208	7.19	0.0001	0	-2	50
		L angular gyurs	110	-8.19	0.0035	-34	-58	22
		L middle frontal gyrus	103	5.76	0.0036	-34	36	30
		L planum temporale	81	6.66	0.0105	-50	-42	14
		L central opercular cortex	78	6.59	0.011	-50	2	6
	R dcP	L putamen	8028	17.45	0	28	0	4
		Precuneous	768	-8.47	0	4	-74	34
		R supplementary motor area	304	7.28	0	-4	-16	62

## Sheet: Table S4
ROI	Seed	Region with FC peak	Size (vox)	T-val	pFDR	x	y	z
L caudate	L VSi	R frontal orbital cortex	3983	14.03	0	-10	8	-10
		R frontal pole	169	6.97	0.0002	2	60	16
		L precentral gyrus	107	-9.87	0.0026	-38	-2	44
		R caudate	100	7.92	0.0029	8	12	12
		L thalamus	80	6.12	0.0077	-30	-28	-6
	L VSs	L thalamus	3405	16.86	0	-12	16	2
		Anterior cingulate gyrus	111	6.73	0.0028	8	40	-4
		L frontal operculum cortex	109	8.52	0.0028	-48	10	2
		L frontal orbital cortex	106	7.62	0.0028	-26	4	-18
		R inferior frontal gyrus, pars opercularis	89	6.85	0.0054	48	12	20
		L paracingulate gyurs	87	6.37	0.0054	-8	38	0
		L inferior frontal gyrus, pars opercularis	54	6.72	0.0359	-34	20	20
	L DC	L caudate	3151	15.63	0	-12	16	8
		L putamen	463	11.23	0	-18	6	-12
		R frontal operculum cortex	193	7.67	0.0001	52	4	12
		R frontal orbital cortex	181	9.24	0.0001	16	12	-14
		L frontal pole	84	6.07	0.0084	-14	40	40
		R paracingulate gyrus	66	5.47	0.0205	10	58	6
		L frontal pole	62	5.92	0.0225	-18	52	4
		Precuneous	48	-6.21	0.044	4	-44	52
		L superior frontal gyrus	48	6.96	0.044	-2	40	38
R caudate	R VSi	L putamen	4051	12.34	0	8	8	-8
		R caudate	118	7.74	0.0018	14	8	12
		L temporo-occipital middle temporal gyrus	97	8.24	0.0041	-54	-62	2
		Posterior cingulate gyrus	58	10.01	0.0324	14	-40	0
	R VSs	R putamen	4386	15.5	0	10	16	0
		Anterior cingulate gyrus	214	7.94	0	18	44	-2
		L frontal orbital cortex	204	6.99	0	-12	-2	-16
		R frontal orbital cortex	103	6.65	0.0027	12	4	-18
		R posterior superior temporal gyrus	81	6.49	0.0066	58	-18	0
		L middle frontal gyrus	69	6.98	0.0121	-36	20	20
	R DC	R caudate	6338	14.33	0	14	14	10
		Precuneous	189	-9.84	0.0002	-8	-72	60
L putamen	L vrP	L putamen	6559	14.36	0	-20	14	-4
		R thalamus	184	5.69	0.0001	0	-26	4
	L drP	L putamen	5497	16.01	0	-26	10	6
		R amygdala	263	6.75	0	30	-6	-10
		Precuneous	60	-5.9	0.0316	2	-66	62
		L frontal orbital cortex	51	-7.01	0.0493	-8	20	-24
	L dcP	R putamen	3601	14.92	0	-28	0	2
		R middle frontal gyrus	280	-10.12	0	28	14	40
		L interior lateral occipital cortex	107	6.59	0.0014	-46	-72	10
		L central opercular cortex	83	7.6	0.0048	-50	0	4
		Vermis 3	67	6.98	0.0115	0	-42	-6
		L frontal orbital cortex	57	-10.76	0.0199	-20	24	-24
		L amygdala	55	5.59	0.0201	-28	2	-10
		Precuneous	48	-7.53	0.0303	6	-70	60
R putamen	R vrP	R putamen	7018	10.72	0	20	12	-2
		L planum temporale	205	8.12	0	-42	-34	4
		L inferior lateral occipital cortex	74	7.14	0.0175	-46	-78	6
	R drP	L putamen	6916	12.82	0	26	10	6
	R dcP	R putamen	5412	12.29	0	28	0	4
		L anterior inferior temporal gyrus	100	8.6	0.0052	-50	0	-38
		L central opercular cortex	75	7.4	0.0161	-52	-2	4
